# Supplementary material
Source: publisher figshare collection journal article supplement (https://microbiology.figshare.com/articles/dataset/_/24188649)
Supplement: Supplementary file 1 [file 1]

| ENA_accession | Sample_site                                  | Experiment   | Sample_replicate_ID |
|---------------|----------------------------------------------|--------------|---------------------|
| ERS15972987   | CARRIAGE                                     | Experiment_1 | replicate_ID_1      |
| ERS15972988   | CARRIAGE                                     | Experiment_1 | replicate_ID_2      |
| ERS15972932   | CARRIAGE                                     | Experiment_1 | replicate_ID_3      |
| ERS15972931   | CARRIAGE                                     | Experiment_1 | replicate_ID_4      |
| ERS15972930   | CARRIAGE                                     | Experiment_1 | replicate_ID_5      |
| ERS15972933   | CARRIAGE                                     | Experiment_1 | replicate_ID_6      |
| ERS15972934   | CARRIAGE                                     | Experiment_1 | replicate_ID_7      |
| ERS15972937   | CARRIAGE                                     | Experiment_1 | replicate_ID_8      |
| ERS15972935   | CARRIAGE                                     | Experiment_1 | replicate_ID_9      |
| ERS15972938   | CARRIAGE                                     | Experiment_1 | replicate_ID_10     |
| ERS15972936   | CARRIAGE                                     | Experiment_1 | replicate_ID_11     |
| ERS15972940   | CARRIAGE                                     | Experiment_1 | replicate_ID_12     |
| ERS15972939   | CARRIAGE                                     | Experiment_1 | replicate_ID_13     |
| ERS15972941   | CARRIAGE                                     | Experiment_1 | replicate_ID_14     |
| ERS15972944   | CARRIAGE                                     | Experiment_1 | replicate_ID_15     |
| ERS15972942   | CARRIAGE                                     | Experiment_1 | replicate_ID_16     |
| ERS15972946   | CARRIAGE                                     | Experiment_1 | replicate_ID_17     |
| ERS15972943   | CARRIAGE                                     | Experiment_1 | replicate_ID_18     |
| ERS15972945   | CARRIAGE                                     | Experiment_1 | replicate_ID_19     |
| ERS15972947   | CARRIAGE                                     | Experiment_1 | replicate_ID_20     |
| ERS15972948   | Wellcome_Sanger_Institute_Healthy_Volunteers | Experiment_1 | replicate_ID_21     |
| ERS15972949   | Wellcome_Sanger_Institute_Healthy_Volunteers | Experiment_1 | replicate_ID_22     |
| ERS15972950   | Wellcome_Sanger_Institute_Healthy_Volunteers | Experiment_1 | replicate_ID_23     |
| ERS15972951   | Wellcome_Sanger_Institute_Healthy_Volunteers | Experiment_1 | replicate_ID_24     |
| ERS15972952   | Wellcome_Sanger_Institute_Healthy_Volunteers | Experiment_1 | replicate_ID_25     |
| ERS15972954   | Wellcome_Sanger_Institute_Healthy_Volunteers | Experiment_1 | replicate_ID_26     |
| ERS15972953   | Wellcome_Sanger_Institute_Healthy_Volunteers | Experiment_1 | replicate_ID_27     |
| ERS15972956   | Wellcome_Sanger_Institute_Healthy_Volunteers | Experiment_1 | replicate_ID_28     |
| ERS15972955   | Wellcome_Sanger_Institute_Healthy_Volunteers | Experiment_1 | replicate_ID_29     |
| ERS15972957   | Wellcome_Sanger_Institute_Healthy_Volunteers | Experiment_1 | replicate_ID_30     |
| ERS15972958   | Control                                      | Experiment_1 | control             |
| ERS15972959   | Control                                      | Experiment_1 | control             |
| ERS15972960   | Control                                      | Experiment_1 | control             |
| ERS15972961   | Control                                      | Experiment_1 | control             |
| ERS15972962   | Mock_Community                               | Experiment_1 | replicate_ID_35     |
| ERS15972963   | Mock_Community                               | Experiment_1 | replicate_ID_36     |
| ERS15972965   | Mock_Community                               | Experiment_1 | replicate_ID_37     |
| ERS15972964   | Mock_Community                               | Experiment_1 | replicate_ID_38     |
| ERS15972967   | Control                                      | Experiment_1 | control             |
| ERS15972966   | Control                                      | Experiment_1 | control             |
| ERS15972968   | CARRIAGE                                     | Experiment_1 | replicate_ID_1      |
| ERS15972969   | CARRIAGE                                     | Experiment_1 | replicate_ID_2      |
| ERS15972971   | CARRIAGE                                     | Experiment_1 | replicate_ID_3      |
| ERS15972970   | CARRIAGE                                     | Experiment_1 | replicate_ID_4      |
| ERS15972974   | CARRIAGE                                     | Experiment_1 | replicate_ID_5      |

|             |                                              |              |                 |
|-------------|----------------------------------------------|--------------|-----------------|
| ERS15972972 | CARRIAGE                                     | Experiment_1 | replicate_ID_6  |
| ERS15972973 | CARRIAGE                                     | Experiment_1 | replicate_ID_7  |
| ERS15972975 | CARRIAGE                                     | Experiment_1 | replicate_ID_8  |
| ERS15972976 | CARRIAGE                                     | Experiment_1 | replicate_ID_9  |
| ERS15972977 | CARRIAGE                                     | Experiment_1 | replicate_ID_10 |
| ERS15972978 | CARRIAGE                                     | Experiment_1 | replicate_ID_11 |
| ERS15972979 | CARRIAGE                                     | Experiment_1 | replicate_ID_12 |
| ERS15972980 | CARRIAGE                                     | Experiment_1 | replicate_ID_13 |
| ERS15972981 | CARRIAGE                                     | Experiment_1 | replicate_ID_14 |
| ERS15972982 | CARRIAGE                                     | Experiment_1 | replicate_ID_15 |
| ERS15972983 | CARRIAGE                                     | Experiment_1 | replicate_ID_16 |
| ERS15972984 | CARRIAGE                                     | Experiment_1 | replicate_ID_17 |
| ERS15972986 | CARRIAGE                                     | Experiment_1 | replicate_ID_18 |
| ERS15972985 | CARRIAGE                                     | Experiment_1 | replicate_ID_19 |
| ERS15972989 | CARRIAGE                                     | Experiment_1 | replicate_ID_20 |
| ERS15972990 | Mock_Community                               | Experiment_1 | replicate_ID_35 |
| ERS15972991 | Mock_Community                               | Experiment_1 | replicate_ID_36 |
| ERS15972992 | Mock_Community                               | Experiment_1 | replicate_ID_37 |
| ERS15972994 | Mock_Community                               | Experiment_1 | replicate_ID_38 |
| ERS15972993 | Wellcome_Sanger_Institute_Healthy_Volunteers | Experiment_1 | replicate_ID_21 |
| ERS15972995 | Wellcome_Sanger_Institute_Healthy_Volunteers | Experiment_1 | replicate_ID_22 |
| ERS15972997 | Wellcome_Sanger_Institute_Healthy_Volunteers | Experiment_1 | replicate_ID_23 |
| ERS15972996 | Wellcome_Sanger_Institute_Healthy_Volunteers | Experiment_1 | replicate_ID_24 |
| ERS15972999 | Wellcome_Sanger_Institute_Healthy_Volunteers | Experiment_1 | replicate_ID_25 |
| ERS15972998 | Wellcome_Sanger_Institute_Healthy_Volunteers | Experiment_1 | replicate_ID_26 |
| ERS15973000 | Wellcome_Sanger_Institute_Healthy_Volunteers | Experiment_1 | replicate_ID_27 |
| ERS15973001 | Wellcome_Sanger_Institute_Healthy_Volunteers | Experiment_1 | replicate_ID_28 |
| ERS15973002 | Wellcome_Sanger_Institute_Healthy_Volunteers | Experiment_1 | replicate_ID_29 |
| ERS15973003 | Wellcome_Sanger_Institute_Healthy_Volunteers | Experiment_1 | replicate_ID_30 |
| ERS15973004 | Mock_Community                               | Experiment_1 | replicate_ID_35 |
| ERS15973005 | Mock_Community                               | Experiment_1 | replicate_ID_36 |
| ERS15973006 | Mock_Community                               | Experiment_1 | replicate_ID_37 |
| ERS15973007 | Mock_Community                               | Experiment_1 | replicate_ID_38 |
| ERS15973009 | Mock_Community                               | Experiment_1 | replicate_ID_35 |
| ERS15973008 | Mock_Community                               | Experiment_1 | replicate_ID_36 |
| ERS15973010 | Wellcome_Sanger_Institute_Healthy_Volunteers | Experiment_1 | replicate_ID_21 |
| ERS15973011 | Wellcome_Sanger_Institute_Healthy_Volunteers | Experiment_1 | replicate_ID_22 |
| ERS15973012 | Wellcome_Sanger_Institute_Healthy_Volunteers | Experiment_1 | replicate_ID_23 |
| ERS15973013 | Wellcome_Sanger_Institute_Healthy_Volunteers | Experiment_1 | replicate_ID_24 |
| ERS15973014 | Wellcome_Sanger_Institute_Healthy_Volunteers | Experiment_1 | replicate_ID_25 |
| ERS15973015 | Wellcome_Sanger_Institute_Healthy_Volunteers | Experiment_1 | replicate_ID_26 |
| ERS15973016 | Wellcome_Sanger_Institute_Healthy_Volunteers | Experiment_1 | replicate_ID_27 |
| ERS15973017 | Wellcome_Sanger_Institute_Healthy_Volunteers | Experiment_1 | replicate_ID_28 |
| ERS15973019 | Wellcome_Sanger_Institute_Healthy_Volunteers | Experiment_1 | replicate_ID_29 |
| ERS15973018 | Wellcome_Sanger_Institute_Healthy_Volunteers | Experiment_1 | replicate_ID_30 |
| ERS15973021 | Mock_Community                               | Experiment_1 | replicate_ID_37 |

|             |                                              |              |                 |
|-------------|----------------------------------------------|--------------|-----------------|
| ERS15973020 | Mock_Community                               | Experiment_1 | replicate_ID_38 |
| ERS15973022 | Mock_Community                               | Experiment_1 | replicate_ID_35 |
| ERS15973023 | Mock_Community                               | Experiment_1 | replicate_ID_36 |
| ERS15973024 | Mock_Community                               | Experiment_1 | replicate_ID_37 |
| ERS15973027 | Mock_Community                               | Experiment_1 | #N/A            |
| ERS15973028 | Wellcome_Sanger_Institute_Healthy_Volunteers | Experiment_2 | replicate_ID_45 |
| ERS15973031 | Wellcome_Sanger_Institute_Healthy_Volunteers | Experiment_2 | replicate_ID_46 |
| ERS15973034 | Wellcome_Sanger_Institute_Healthy_Volunteers | Experiment_2 | replicate_ID_47 |
| ERS15972929 | Control                                      | Experiment_2 | control         |
| ERS15973037 | Wellcome_Sanger_Institute_Healthy_Volunteers | Experiment_2 | replicate_ID_29 |
| ERS15973038 | Wellcome_Sanger_Institute_Healthy_Volunteers | Experiment_2 | replicate_ID_30 |
| ERS15973039 | Wellcome_Sanger_Institute_Healthy_Volunteers | Experiment_2 | replicate_ID_21 |
| ERS15973040 | Wellcome_Sanger_Institute_Healthy_Volunteers | Experiment_2 | replicate_ID_22 |
| ERS15973041 | Wellcome_Sanger_Institute_Healthy_Volunteers | Experiment_2 | replicate_ID_23 |
| ERS15973042 | Wellcome_Sanger_Institute_Healthy_Volunteers | Experiment_2 | replicate_ID_24 |
| ERS15973043 | Wellcome_Sanger_Institute_Healthy_Volunteers | Experiment_2 | replicate_ID_25 |
| ERS15973044 | Wellcome_Sanger_Institute_Healthy_Volunteers | Experiment_2 | replicate_ID_27 |
| ERS15973045 | Wellcome_Sanger_Institute_Healthy_Volunteers | Experiment_2 | replicate_ID_28 |
| ERS15973046 | Mock_Community                               | Experiment_2 | replicate_ID_35 |
| ERS15973047 | Mock_Community                               | Experiment_2 | replicate_ID_36 |
| ERS15973048 | Mock_Community                               | Experiment_2 | replicate_ID_37 |
| ERS15973049 | Mock_Community                               | Experiment_2 | replicate_ID_38 |
| ERS15973051 | Mock_Community                               | Experiment_2 | replicate_ID_48 |
| ERS15973050 | Control                                      | Experiment_2 | control         |
| ERS15973052 | Control                                      | Experiment_2 | control         |
| ERS15973054 | Mock_Community                               | Experiment_2 | replicate_ID_35 |
| ERS15973053 | Mock_Community                               | Experiment_2 | replicate_ID_36 |
| ERS15973055 | Mock_Community                               | Experiment_2 | replicate_ID_37 |
| ERS15973056 | Mock_Community                               | Experiment_2 | replicate_ID_38 |
| ERS15973057 | Control                                      | Experiment_2 | control         |
| ERS15973059 | Mock_Community                               | Experiment_2 | replicate_ID_36 |
| ERS15973058 | Mock_Community                               | Experiment_2 | replicate_ID_37 |
| ERS15973064 | Wellcome_Sanger_Institute_Healthy_Volunteers | Experiment_2 | replicate_ID_45 |
| ERS15973065 | Wellcome_Sanger_Institute_Healthy_Volunteers | Experiment_2 | replicate_ID_46 |
| ERS15973066 | Wellcome_Sanger_Institute_Healthy_Volunteers | Experiment_2 | replicate_ID_47 |
| ERS15973072 | Mock_Community                               | Experiment_2 | replicate_ID_38 |
| ERS15973070 | Wellcome_Sanger_Institute_Healthy_Volunteers | Experiment_2 | replicate_ID_29 |
| ERS15973073 | Wellcome_Sanger_Institute_Healthy_Volunteers | Experiment_2 | replicate_ID_30 |
| ERS15973074 | Wellcome_Sanger_Institute_Healthy_Volunteers | Experiment_2 | replicate_ID_21 |
| ERS15973075 | Wellcome_Sanger_Institute_Healthy_Volunteers | Experiment_2 | replicate_ID_22 |
| ERS15973076 | Wellcome_Sanger_Institute_Healthy_Volunteers | Experiment_2 | replicate_ID_23 |
| ERS15973077 | Wellcome_Sanger_Institute_Healthy_Volunteers | Experiment_2 | replicate_ID_24 |
| ERS15973078 | Wellcome_Sanger_Institute_Healthy_Volunteers | Experiment_2 | replicate_ID_25 |
| ERS15973079 | Wellcome_Sanger_Institute_Healthy_Volunteers | Experiment_2 | replicate_ID_27 |
| ERS15973082 | Wellcome_Sanger_Institute_Healthy_Volunteers | Experiment_2 | replicate_ID_28 |
| ERS15973084 | Wellcome_Sanger_Institute_Healthy_Volunteers | Experiment_2 | replicate_ID_45 |

|             |                                              |              |                 |
|-------------|----------------------------------------------|--------------|-----------------|
| ERS15973086 | Wellcome_Sanger_Institute_Healthy_Volunteers | Experiment_2 | replicate_ID_46 |
| ERS15973088 | Wellcome_Sanger_Institute_Healthy_Volunteers | Experiment_2 | replicate_ID_47 |
| ERS15973092 | Mock_Community                               | Experiment_2 | replicate_ID_38 |
| ERS15973093 | Wellcome_Sanger_Institute_Healthy_Volunteers | Experiment_2 | replicate_ID_29 |
| ERS15973094 | Wellcome_Sanger_Institute_Healthy_Volunteers | Experiment_2 | replicate_ID_30 |
| ERS15973095 | Wellcome_Sanger_Institute_Healthy_Volunteers | Experiment_2 | replicate_ID_21 |
| ERS15973097 | Wellcome_Sanger_Institute_Healthy_Volunteers | Experiment_2 | replicate_ID_22 |
| ERS15973096 | Wellcome_Sanger_Institute_Healthy_Volunteers | Experiment_2 | replicate_ID_23 |
| ERS15973098 | Wellcome_Sanger_Institute_Healthy_Volunteers | Experiment_2 | replicate_ID_24 |
| ERS15973099 | Wellcome_Sanger_Institute_Healthy_Volunteers | Experiment_2 | replicate_ID_25 |
| ERS15973100 | Wellcome_Sanger_Institute_Healthy_Volunteers | Experiment_2 | replicate_ID_26 |
| ERS15973102 | Wellcome_Sanger_Institute_Healthy_Volunteers | Experiment_2 | replicate_ID_27 |
| ERS15973101 | Wellcome_Sanger_Institute_Healthy_Volunteers | Experiment_2 | replicate_ID_28 |
| ERS15973104 | Mock_Community                               | Experiment_2 | replicate_ID_35 |
| ERS15973103 | Mock_Community                               | Experiment_2 | replicate_ID_36 |
| ERS15973105 | Mock_Community                               | Experiment_2 | replicate_ID_37 |
| ERS15973107 | Mock_Community                               | Experiment_2 | replicate_ID_36 |
| ERS15973110 | Mock_Community                               | Experiment_2 | replicate_ID_37 |
| ERS15973106 | Mock_Community                               | Experiment_2 | replicate_ID_38 |
| ERS15973108 | Mock_Community                               | Experiment_2 | replicate_ID_35 |
| ERS15973109 | Control                                      | Experiment_2 | control         |
