# Supplementary material
Source: publisher figshare collection journal article supplement (https://microbiology.figshare.com/articles/dataset/_/24188649)
Supplement: Supplementary file 2 [file 1]

Archive with 6 entries (6 files):
- Experiment 2 taxonomy.xlsx
- Experiment 1 taxonomy.xlsx
- Supplementary Materials_240923.pdf
- sample_ENA_accessions_metadata.pdf
- Carriage_Study_Team_Authorship_April_2023.docx
- STORMS_Word_1.03_Final.docx
