# Supplementary material
Source: publisher figshare collection journal article supplement (https://microbiology.figshare.com/articles/dataset/_/24188649)
Supplement: Supplementary file 2 [file 1 › Carriage_Study_Team_Authorship_April_2023.docx]

**CARRIAGE Study Team (in alphabetical order)**

Dinesh Aggarwal 1,2, Dr Carl Anderson 2, Katherine L Bellis 1, Beth Blane 1, Joe Brennan 1, Ellena Brooks 1, Susan Burton 3, Dr Adam Butterworth 3, Carol Churcher 1, Professor John Danesh 3, Shannon Duthie 3, Emma Fraser 2, Dr Joan Geoghegan 5, Sophia T Girgis 2, Dr Ewan M Harrison 1,2,3, Rachel Henry 3, Susan Irvine 3, Elisha Johnson 3, Mercedesz Juhasz 3, Stephen Kaptoge 3, Neenu Linson 2, Benjamin McCarthy 2, Dr Amy McMahon 3, Dr Carmel Moore 3, Plamena Naydenova 1, Agnieszka Osmanska 3, Professor Julian Parkhill 4, Professor Sharon Peacock 1, Dr Catherine Perry 3, Dr Kathy E Raven 1, Catarina Ribeiro de Sousa 1, Lauma Sarkane 1, Svetlana Shadrina 3, Dr Matthew R Walker 3.

**Institutions:**1. Department of Medicine, University of Cambridge

2. Wellcome Sanger Institute

3. Department of Public Health and Primary Care, University of Cambridge

4. Department of Veterinary Medicine, University of Cambridge

5. Institute of Microbiology and Infection, University of Birmingham

**Contributions**

**Funding acquisition:** Dr Carl Anderson 2, Professor John Danesh 2,3,Dr Joan Geoghegan 5, Dr Ewan M Harrison 1,2,3, Professor Julian Parkhill 4, Professor Sharon Peacock 1.

**Leadership and supervision:** Dr Carl Anderson 2, Dr Adam Butterworth 3, Carol Churcher 1, Professor John Danesh 3, Dr Joan Geoghegan 5, Dr Ewan M Harrison 1,2,3, Dr Amy McMahon 3, Dr Carmel Moore 3, Professor Julian Parkhill 4, Professor Sharon Peacock 1

**Metadata curation:** Katherine L Bellis 1, Beth Blane 1, Joe Brennan 1, Sophia T Girgis 2, Dr Stephen Kaptoge 3, Plamena Naydenova 1, Dr Catherine Perry 3, Dr Kathy E Raven 1, Catarina Ribeiro de Sousa 1, Lauma Sarkane 1, Dr Matthew R Walker 3

**Project administration:** Katherine L Bellis 1, Beth Blane 1, Ellena Brooks 1, Susan Burton 3, Carol Churcher 1, Shannon Duthie 3, Dr Ewan M Harrison 1,2,3, Rachel Henry 3, Susan Irvine 3, Elisha Johnson 3, Mercedesz Juhasz 3, Dr Amy McMahon 3, Dr Carmel Moore 3

**Samples and logistics:** Katherine L Bellis 1, Beth Blane 1, Joe Brennan 1, Susan Burton 3, Shannon Duthie 3, Emma Fraser 2 ,Sophia T Girgis 2, Dr Ewan M Harrison 1,2,3, Elisha Johnson 3, Mercedesz Juhasz 3, Neenu Linson 2, Benjamin McCarthy 2, Plamena Naydenova 1, Dr Catherine Perry 3, Dr Kathy E Raven 1, Catarina Ribeiro de Sousa 1, Lauma Sarkane 1, Dr Matthew R Walker 3

**Sequencing and analysis:** Dinesh Aggarwal 2, Katherine L Bellis 1, Dr Adam Butterworth 3, Dr Ewan M Harrison 1,2,3, Dr Stephen Kaptoge 3

**Data Management:** Dr Catherine Perry 3, Dr Matthew R Walker 3

**Study Helpdesk**: Susan Burton 3, Shannon Duthie 3, Rachel Henry 3, Susan Irvine 3, Elisha Johnson 3, Mercedesz Juhasz 3, Dr Amy McMahon 3, Dr Carmel Moore 3 , Svetlana Shadrina 3,Agnieszka Osmanska 3
